# Supplementary material
Source: MDPI journal article supplement (https://www.mdpi.com/2076-3417/12/11/5751)
Supplement: s1 [file s1]

Compound %

|                            | L3    | L4    | L5    | L7    | L8    | L9    | L12   | L14   | L15   | L16   | L20   | L21   | L25   | L26   | L27   | L29   | L30   | L33   | L34   | L36   | L37   | L38   | L39   | L41   | L42   | L43   | L45   | L50   | L51   | L52   | L53   | L54   | L57   | L58   |
|----------------------------|-------|-------|-------|-------|-------|-------|-------|-------|-------|-------|-------|-------|-------|-------|-------|-------|-------|-------|-------|-------|-------|-------|-------|-------|-------|-------|-------|-------|-------|-------|-------|-------|-------|-------|
| Monoterpenoids             |       |       |       |       |       |       |       |       |       |       |       |       |       |       |       |       |       |       |       |       |       |       |       |       |       |       |       |       |       |       |       |       |       |       |
| β-CITRONELLENE             | n.d   | n.d.  | 0.03  | 0.03  | 0.04  | 0.06  | 0.02  | 0.18  | 0.03  | 0.03  | 0.05  | 0.10  | 0.05  | 0.08  | 0.04  | 0.07  | 0.05  | 0.12  | 0.14  | 0.06  | 0.18  | 0.23  | 0.11  | 0.37  | 0.01  | 0.10  | 0.07  | 0.32  | 0.23  | 0.01  | 0.29  | n.d   | 0.13  | 0.07  |
| Dev. St                    | 0.02  | 0.03  | 0.02  | 0.02  | 0.01  | 0.03  | 0.01  | 0.01  | 0.00  | 0.01  | 0.05  | 0.02  | 0.04  | 0.01  | 0.02  | 0.10  | 0.00  | 0.01  | 0.05  | 0.10  | 0.07  | 0.01  | 0.26  | 0.03  | 0.01  | 0.07  | 0.15  | 0.04  | 0.06  | 0.00  | 0.12  | 0.00  | 0.05  | 0.00  |
| β-PINENE                   | 0.07  | 0.20  | 0.02  | 0.00  | 0.14  | 0.06  | 0.07  | 0.34  | 0.04  | 0.09  | 0.06  | 0.10  | 0.09  | 0.07  | 0.06  | 0.08  | 0.20  | 0.37  | 0.10  | 0.07  | 0.23  | 0.12  | 0.13  | 0.10  | 0.09  | 0.14  | 0.05  | 0.12  | 0.11  | 0.45  | 0.16  | 0.42  | 0.08  | 0.42  |
| Dev. St                    | 0.03  | 0.05  | 0.03  | 0.05  | 0.23  | 0.13  | 0.05  | 0.04  | 0.02  | 0.02  | 0.03  | 0.04  | 0.02  | 0.03  | 0.01  | 0.02  | 0.04  | 0.02  | 0.03  | 0.12  | 0.15  | 0.03  | 0.03  | 0.02  | 0.02  | 0.00  | 0.03  | 0.01  | 0.01  | 0.01  | 0.03  | 0.05  | 0.01  | 0.01  |
| MYRCENE                    | 10.16 | 15.26 | 19.40 | 17.41 | 11.15 | 14.07 | 13.82 | 14.12 | 21.20 | 17.14 | 17.83 | 22.27 | 24.64 | 13.45 | 13.45 | 25.05 | 26.28 | 18.66 | 27.93 | 31.48 | 21.24 | 28.03 | 22.40 | 21.70 | 20.56 | 21.37 | 22.18 | 17.42 | 22.05 | 29.68 | 24.82 | 21.22 | 26.45 | 24.08 |
| Dev. St                    | 0.29  | 1.13  | 0.22  | 0.52  | 2.03  | 0.85  | 0.26  | 1.49  | 0.06  | 1.53  | 1.77  | 0.58  | 1.68  | 0.27  | 8.24  | 1.90  | 1.14  | 0.82  | 2.41  | 6.68  | 2.37  | 1.32  | 2.35  | 0.71  | 0.19  | 0.80  | 0.09  | 4.04  | 1.85  | 9.71  | 1.20  | 0.90  | 4.44  | 2.83  |
| LIMONENE                   | 0.03  | 0.75  | 0.02  | 0.72  | 0.28  | 0.02  | 0.02  | 0.41  | 0.01  | 0.01  | 0.04  | 0.04  | 0.03  | 0.43  | 0.02  | 0.02  | 0.54  | 0.74  | 0.04  | 0.03  | 0.06  | 0.05  | 0.03  | 0.06  | 0.05  | 0.30  | 0.03  | 0.04  | 0.03  | 0.72  | 0.05  | 0.73  | 0.02  | 0.03  |
| Dev. St                    | 0.02  | 0.21  | 0.01  | 0.03  | 0.13  | 0.01  | 0.01  | 0.06  | 0.01  | 0.00  | 0.02  | 0.02  | 0.01  | 0.05  | 0.00  | 0.01  | 0.08  | 0.13  | 0.01  | 0.01  | 0.03  | 0.00  | 0.00  | 0.02  | 0.00  | 0.21  | 0.01  | 0.00  | 0.02  | 0.13  | 0.01  | 0.77  | 0.00  | 0.01  |
| Sum                        | 10.26 | 16.21 | 19.46 | 18.15 | 11.60 | 14.20 | 13.93 | 15.05 | 21.27 | 17.28 | 17.98 | 22.52 | 24.81 | 14.03 | 13.57 | 25.21 | 27.08 | 19.90 | 28.20 | 31.63 | 21.70 | 28.43 | 22.68 | 22.24 | 20.71 | 21.92 | 22.33 | 17.90 | 22.41 | 30.85 | 25.32 | 22.37 | 26.68 | 24.59 |
| Sesquiterpene hydrocarbons |       |       |       |       |       |       |       |       |       |       |       |       |       |       |       |       |       |       |       |       |       |       |       |       |       |       |       |       |       |       |       |       |       |       |
| TRANS BERGAMOTENE          | 0.31  | 0.07  | 1.46  | 0.48  | 0.94  | 0.61  | 0.77  | 0.00  | 1.07  | 0.84  | 1.20  | 0.05  | 0.08  | 0.58  | 0.40  | 0.30  | 0.66  | 0.42  | 0.89  | 0.25  | 0.12  | 0.15  | 0.06  | 0.09  | 0.06  | 0.32  | 0.17  | 0.06  | 0.07  | 0.01  | 0.31  | 0.50  | 0.07  | 0.38  |
| Dev. St                    | 0.11  | 0.04  | 0.64  | 0.10  | 0.01  | 0.07  | 0.67  | 0.00  | 0.45  | 0.20  | 0.62  | 0.00  | 0.00  | 0.09  | 0.17  | 0.43  | 0.00  | 0.04  | 0.04  | 0.33  | 0.01  | 0.04  | 0.06  | 0.04  | 0.01  | 0.01  | 0.08  | 0.02  | 0.27  | 0.00  | 0.14  | 0.10  | 0.04  | 0.08  |
| β-CARIOFILLENE             | 11.22 | 8.15  | 2.06  | 10.12 | 8.01  | 7.72  | 10.34 | 18.07 | 14.59 | 12.69 | 8.25  | 7.35  | 7.94  | 14.97 | 10.95 | 10.32 | 10.59 | 11.52 | 15.19 | 10.28 | 16.78 | 11.85 | 14.77 | 12.46 | 10.41 | 11.52 | 4.78  | 12.71 | 8.93  | 10.55 | 2.11  | 11.11 | 14.61 | 6.97  |
| Dev. St                    | 3.34  | 0.25  | 6.60  | 1.87  | 0.35  | 2.37  | 2.83  | 1.72  | 0.35  | 2.94  | 0.44  | 3.44  | 2.39  | 1.62  | 1.27  | 4.51  | 0.43  | 0.49  | 6.91  | 3.85  | 4.26  | 1.81  | 0.84  | 0.69  | 0.64  | 1.12  | 5.85  | 1.53  | 0.32  | 1.09  | 7.10  | 0.63  | 1.66  | 1.57  |
| TRANS β-FARNESENE          | 2.51  | 1.67  | 5.10  | 8.71  | 10.46 | 0.24  | 1.26  | 0.50  | 9.69  | 10.36 | 15.89 | 2.19  | 1.05  | 1.77  | 1.89  | 3.68  | 0.06  | 1.11  | 2.16  | 0.76  | 3.90  | 7.68  | 1.04  | 1.16  | 0.40  | 9.99  | 0.67  | 0.40  | 2.44  | 0.43  | 9.67  | 0.23  | 3.06  | 0.20  |
| Dev. St                    | 1.27  | 4.40  | 2.12  | 0.17  | 4.14  | 0.05  | 0.94  | 0.13  | 0.85  | 0.15  | 10.18 | 0.71  | 0.07  | 0.59  | 1.90  | 2.57  | 0.01  | 1.04  | 0.88  | 0.75  | 1.41  | 2.59  | 0.07  | 0.08  | 0.04  | 1.32  | 1.00  | 0.51  | 3.05  | 0.06  | 2.74  | 0.07  | 1.34  | 0.01  |
| α UMULENE                  | 29.71 | 22.48 | 3.31  | 22.92 | 21.74 | 9.13  | 10.39 | 14.05 | 32.71 | 24.53 | 1.86  | 17.17 | 9.13  | 2.50  | 0.54  | 3.35  | 15.65 | 30.11 | 31.10 | 19.85 | 25.90 | 19.63 | 3.83  | 4.98  | 32.71 | 24.42 | 10.75 | 34.75 | 1.08  | 20.06 | 23.09 | 19.74 | 23.89 | 15.79 |
| Dev. St                    | 12.93 | 2.41  | 0.64  | 0.39  | 6.28  | 0.31  | 5.48  | 2.90  | 0.99  | 14.55 | 0.90  | 5.51  | 3.88  | 1.42  | 0.31  | 4.13  | 0.17  | 3.60  | 10.16 | 2.50  | 10.21 | 1.60  | 14.97 | 6.77  | 2.17  | 0.26  | 16.27 | 23.60 | 18.91 | 0.55  | 5.35  | 3.54  | 2.72  | 2.14  |
| α FARNESENE                | 1.02  | 1.21  | 0.16  | 0.01  | 0.04  | 0.84  | 0.11  | 0.00  | 0.04  | 0.01  | 0.12  | 1.16  | 0.96  | 0.11  | 0.04  | 0.94  | 0.40  | 0.00  | 1.10  | 0.66  | 0.31  | 0.81  | 1.32  | 0.22  | 0.07  | 0.36  | 0.77  | 1.36  | 1.27  | 1.80  | 1.42  | 0.99  | 1.80  | 2.12  |
| Dev. St                    | 0.89  | 0.17  | 0.08  | 0.06  | 0.13  | 0.09  | 0.05  | 1.91  | 0.01  | 0.11  | 0.05  | 0.20  | 0.16  | 0.04  | 0.70  | 0.45  | 0.11  | 0.00  | 0.34  | 0.01  | 0.02  | 0.69  | 0.12  | 0.09  | 0.01  | 0.03  | 0.33  | 0.04  | 0.34  | 0.12  | 0.33  | 0.69  | 0.20  | 0.91  |
| β-SELINENE                 | 9.92  | 5.59  | 8.27  | 5.32  | 6.91  | 19.21 | 15.28 | 14.52 | 1.11  | 1.37  | 10.50 | 0.41  | 0.78  | 23.92 | 17.54 | 13.06 | 9.23  | 3.65  | 0.15  | 0.27  | 0.31  | 0.34  | 0.97  | 27.61 | 0.77  | 9.74  | 0.11  | 0.06  | 0.62  | 12.13 | 0.32  | 15.27 | 0.33  | 0.51  |
| Dev. St                    | 5.09  | 0.09  | 2.50  | 0.24  | 4.28  | 0.98  | 0.89  | 1.39  | 0.17  | 6.07  | 3.20  | 0.44  | 0.04  | 1.88  | 2.38  | 2.11  | 0.73  | 0.69  | 0.14  | 0.25  | 0.03  | 0.02  | 0.62  | 3.27  | 0.21  | 1.40  | 0.03  | 0.04  | 0.40  | 0.35  | 0.80  | 0.01  | 0.93  | 0.02  |
| α-SELINENE                 | 12.40 | 6.35  | 4.73  | 6.60  | 8.78  | 13.17 | 15.39 | 14.50 | 12.66 | 2.17  | 11.14 | 7.61  | 18.51 | 20.13 | 14.27 | 13.90 | 9.34  | 3.46  | 3.28  | 7.14  | 7.37  | 7.56  | 18.68 | 5.83  | 1.14  | 6.21  | 5.76  | 8.94  | 11.25 | 14.61 | 6.20  | 6.11  | 8.18  | 10.28 |
| Dev. St                    | 5.14  | 0.08  | 0.92  | 0.04  | 0.36  | 0.80  | 0.04  | 1.54  | 1.16  | 6.38  | 1.37  | 8.94  | 2.57  | 1.01  | 0.47  | 5.25  | 0.04  | 0.06  | 2.84  | 4.45  | 1.64  | 0.46  | 12.12 | 2.86  | 0.26  | 0.30  | 1.76  | 2.81  | 5.77  | 1.31  | 1.02  | 0.93  | 0.57  | 3.20  |
| τ CADINENE                 | 2.31  | 3.43  | 0.02  | 1.31  | 3.43  | 0.53  | 0.68  | 2.01  | 0.18  | 1.05  | 0.59  | 5.97  | 18.73 | 0.77  | 0.44  | 0.57  | 1.19  | 4.21  | 4.13  | 5.26  | 8.20  | 8.01  | 11.47 | 1.34  | 4.32  | 0.94  | 3.44  | 1.71  | 12.56 | 1.21  | 3.00  | 0.88  | 9.35  | 7.02  |
| Dev. St                    | 1.14  | 0.57  | 0.76  | 0.02  | 0.35  | 0.02  | 0.05  | 0.23  | 0.29  | 0.36  | 0.12  | 9.74  | 2.80  | 0.16  | 0.03  | 0.61  | 1.46  | 0.38  | 0.32  | 0.99  | 4.71  | 0.61  | 6.70  | 0.17  | 0.17  | 0.95  | 0.50  | 7.46  | 5.93  | 0.11  | 3.86  | 0.39  | 0.76  | 0.99  |
| Sum                        | 69.40 | 48.96 | 25.11 | 55.46 | 60.31 | 51.45 | 54.21 | 63.65 | 72.04 | 53.03 | 49.54 | 41.90 | 57.19 | 64.75 | 46.07 | 46.11 | 47.12 | 54.48 | 58.00 | 44.47 | 62.90 | 56.05 | 52.16 | 53.69 | 49.89 | 63.49 | 26.46 | 59.99 | 38.20 | 60.80 | 46.11 | 54.83 | 61.30 | 43.26 |

## Oxygenated monoterpenes

|                   |      |      |      |      |      |      |      |      |      |      |      |      |      |      |      |      |      |      |      |      |      |      |      |      |      |      |      |      |      |      |      |      |      |      |
|-------------------|------|------|------|------|------|------|------|------|------|------|------|------|------|------|------|------|------|------|------|------|------|------|------|------|------|------|------|------|------|------|------|------|------|------|
| $\beta$ -LINALOOL | 0.43 | 0.31 | 0.69 | 0.62 | 0.28 | 0.48 | 0.56 | 0.71 | 0.33 | 0.28 | 0.42 | 1.17 | 1.15 | 0.48 | 0.34 | 0.55 | 0.73 | 0.80 | 0.94 | 0.94 | 0.48 | 0.69 | 0.98 | 0.82 | 0.33 | 0.73 | 0.70 | 0.38 | 0.80 | 1.29 | 2.15 | 0.65 | 0.35 | 1.04 |
| Dev. St           | 0.16 | 0.05 | 0.20 | 0.21 | 0.03 | 0.01 | 0.22 | 0.07 | 0.01 | 0.14 | 0.12 | 0.24 | 0.33 | 0.09 | 0.08 | 0.25 | 0.05 | 0.18 | 0.02 | 0.12 | 0.16 | 0.09 | 0.07 | 0.37 | 0.07 | 0.01 | 0.23 | 0.42 | 0.06 | 0.11 | 1.02 | 0.38 | 0.24 | 0.55 |
| sum               | 0.43 | 0.31 | 0.69 | 0.62 | 0.28 | 0.48 | 0.56 | 0.71 | 0.33 | 0.28 | 0.42 | 1.17 | 1.15 | 0.48 | 0.34 | 0.55 | 0.73 | 0.80 | 0.94 | 0.94 | 0.48 | 0.69 | 0.98 | 0.82 | 0.33 | 0.73 | 0.70 | 0.38 | 0.80 | 1.29 | 2.15 | 0.65 | 0.35 | 1.04 |

## Esters

|                                |      |      |      |      |      |      |      |      |      |      |      |      |      |      |      |      |      |      |      |      |      |      |      |      |      |      |      |      |      |      |      |      |      |      |
|--------------------------------|------|------|------|------|------|------|------|------|------|------|------|------|------|------|------|------|------|------|------|------|------|------|------|------|------|------|------|------|------|------|------|------|------|------|
| OCTANOIC ACID METHYLESTER      | 3.29 | 1.91 | 1.04 | 0.60 | 1.00 | 0.57 | 0.77 | 0.34 | 0.38 | 0.47 | 0.81 | 0.48 | 0.47 | 1.65 | 1.42 | 0.89 | 0.55 | 1.10 | 0.55 | 0.57 | 0.54 | 0.74 | 0.59 | 2.00 | 0.83 | 0.56 | 0.30 | 0.38 | 0.42 | 1.53 | 0.76 | 0.63 | 0.21 | 0.42 |
| Dev. St                        | 1.66 | 0.53 | 0.32 | 0.17 | 0.11 | 0.05 | 0.35 | 0.00 | 0.07 | 0.28 | 0.05 | 0.09 | 0.05 | 0.24 | 0.56 | 0.05 | 0.11 | 0.27 | 0.04 | 0.06 | 0.33 | 0.33 | 0.06 | 0.66 | 0.05 | 0.11 | 0.01 | 0.08 | 0.06 | 0.26 | 0.17 | 0.55 | 0.05 | 0.02 |
| TRANS GERANIC ACID METHYLESTER | 2.23 | 1.48 | 0.00 | 0.02 | 0.01 | 0.05 | 0.06 | 0.00 | 0.03 | 0.09 | 0.11 | 0.81 | 0.46 | 0.08 | 0.12 | 1.36 | 0.03 | 0.00 | 0.42 | 0.77 | 0.41 | 0.64 | 0.76 | 0.05 | 0.02 | 0.76 | 0.43 | 0.21 | 0.42 | 0.00 | 0.74 | 0.07 | 0.36 | 0.75 |
| Dev. St                        | 0.98 | 0.92 | 0.01 | 0.04 | 0.21 | 0.01 | 0.01 | 0.00 | 0.01 | 0.02 | 0.06 | 0.40 | 0.04 | 0.04 | 2.82 | 2.88 | 0.00 | 0.00 | 0.38 | 0.06 | 0.12 | 0.18 | 0.05 | 0.20 | 0.01 | 0.01 | 0.03 | 0.13 | 0.16 | 0.07 | 0.00 | 0.06 | 0.02 | 0.07 |
| METHYL GERANOATO               | 3.55 | 3.50 | 1.56 | 0.90 | 0.76 | 0.83 | 1.08 | 0.00 | 0.27 | 0.49 | 0.84 | 0.49 | 0.39 | 1.19 | 0.83 | 0.80 | 0.92 | 0.00 | 0.31 | 0.29 | 0.24 | 0.31 | 0.44 | 2.78 | 1.48 | 1.01 | 0.16 | 0.14 | 0.31 | 0.00 | 0.34 | 0.75 | 0.36 | 0.36 |
| Dev. St                        | 2.55 | 1.53 | 0.60 | 0.25 | 0.29 | 0.56 | 0.52 | 0.44 | 0.21 | 0.26 | 0.10 | 0.03 | 0.04 | 0.16 | 0.08 | 0.80 | 0.81 | 0.00 | 0.07 | 0.09 | 0.06 | 0.03 | 0.08 | 1.13 | 0.46 | 0.34 | 0.03 | 1.31 | 0.32 | 0.36 | 0.07 | 0.01 | 0.10 | 0.09 |
| sum                            | 9.07 | 6.89 | 2.60 | 1.52 | 1.77 | 1.45 | 1.91 | 0.34 | 0.68 | 1.04 | 1.76 | 1.78 | 1.32 | 2.92 | 2.37 | 3.04 | 1.50 | 1.10 | 1.28 | 1.63 | 1.19 | 1.70 | 1.79 | 4.83 | 2.33 | 2.32 | 0.89 | 0.73 | 1.15 | 1.54 | 1.84 | 1.44 | 0.93 | 1.54 |

## Ketones

|              |      |      |      |      |      |      |      |      |      |      |      |      |      |      |      |      |      |      |      |      |      |      |      |      |      |      |      |      |      |      |      |      |      |      |
|--------------|------|------|------|------|------|------|------|------|------|------|------|------|------|------|------|------|------|------|------|------|------|------|------|------|------|------|------|------|------|------|------|------|------|------|
| 2-UNDECANONE | 7.25 | 4.90 | 5.70 | 1.87 | 2.28 | 2.21 | 2.63 | 3.94 | 1.42 | 0.22 | 2.84 | 4.74 | 2.49 | 2.86 | 3.18 | 1.57 | 0.85 | 0.80 | 1.55 | 0.46 | 0.36 | 1.44 | 3.00 | 5.49 | 6.16 | 2.12 | 2.96 | 0.41 | 2.91 | 4.74 | 5.49 | 4.91 | 1.79 | 5.12 |
| sum          | 7.25 | 4.90 | 5.70 | 1.87 | 2.28 | 2.21 | 2.63 | 3.94 | 1.42 | 0.22 | 2.84 | 4.74 | 2.49 | 2.86 | 3.18 | 1.57 | 0.85 | 0.80 | 1.55 | 0.46 | 0.36 | 1.44 | 3.00 | 5.49 | 6.16 | 2.12 | 2.96 | 0.41 | 2.91 | 4.74 | 5.49 | 4.91 | 1.79 | 5.12 |
| Dev. St      | 3.40 | 0.71 | 3.03 | 0.31 | 0.26 | 0.49 | 0.49 | 0.81 | 0.43 | 1.91 | 0.26 | 2.50 | 0.54 | 0.26 | 0.75 | 1.36 | 0.38 | 0.27 | 1.15 | 1.31 | 0.93 | 0.11 | 0.67 | 1.43 | 1.37 | 0.23 | 1.67 | 1.20 | 0.88 | 0.92 | 2.57 | 0.02 | 0.06 | 2.22 |

**Others/unknown**

[illegible]
