# Supplementary material
Source: MDPI journal article supplement (https://www.mdpi.com/2076-3417/12/11/5751)
Supplement: s1 [file s1]

**Table S1.** In table, the allelic profile of the sixty accessions analyzed with the eight SSR primers.

| ID  | H1AGA7 | H1AGA7 | H1GT16 | H1GT16 | H1GT17 | H1GT17 | H1ACA3 | H1ACA3 | H1AGA6 | H1AGA6 | H1GA23 | H1GA23 | H1GA31 | H1GA31 | H1GT14 | H1GT14 |
|-----|--------|--------|--------|--------|--------|--------|--------|--------|--------|--------|--------|--------|--------|--------|--------|--------|
| L1  | 166    | 187    | 233    | 233    | 189    | 189    | 206    | 210    | 170    | 199    | 255    | 299    | 166    | 166    | 165    | 165    |
| L2  | 160    | 166    | 211    | 237    | 177    | 185    | 210    | 220    | 199    | 199    | 271    | 297    | 164    | 188    | 167    | 167    |
| L3  | 181    | 187    | 233    | 233    | 177    | 185    | 210    | 220    | 172    | 182    | 299    | 299    | 164    | 164    | 167    | 167    |
| L4  | 181    | 187    | 229    | 229    | 177    | 185    | 210    | 220    | 174    | 182    | 299    | 299    | 164    | 164    | 161    | 161    |
| L5  | 187    | 187    | 229    | 233    | 187    | 187    | 210    | 220    | 182    | 182    | 244    | 305    | 164    | 164    | 165    | 165    |
| L6  | 187    | 187    | 227    | 233    | 175    | 185    | 210    | 230    | 170    | 170    | 257    | 267    | 160    | 164    | 167    | 167    |
| L7  | 187    | 187    | 211    | 231    | 187    | 187    | 210    | 210    | 186    | 191    | 267    | 289    | 160    | 160    | 167    | 167    |
| L8  | 185    | 185    | 229    | 233    | 175    | 179    | 210    | 210    | 172    | 186    | 251    | 303    | 164    | 164    | 165    | 167    |
| L9  | 187    | 187    | 213    | 237    | 175    | 193    | 210    | 238    | 170    | 182    | 289    | 289    | 160    | 166    | 167    | 167    |
| L10 | 166    | 190    | 211    | 229    | 183    | 185    | 220    | 235    | 188    | 191    | 244    | 281    | 160    | 160    | 161    | 167    |
| L11 | 166    | 166    | 229    | 237    | 177    | 187    | 222    | 222    | 182    | 191    | 244    | 269    | 160    | 164    | 167    | 167    |
| L12 | 187    | 187    | 233    | 237    | 175    | 175    | 210    | 235    | 176    | 182    | 244    | 287    | 160    | 188    | 165    | 167    |
| L13 | 178    | 181    | 233    | 237    | 175    | 185    | 220    | 238    | 186    | 191    | 303    | 303    | 164    | 166    | 161    | 167    |
| L14 | 187    | 187    | 211    | 237    | 175    | 193    | 210    | 238    | 170    | 182    | 289    | 289    | 160    | 166    | 167    | 175    |
| L15 | 190    | 190    | 211    | 231    | 185    | 185    | 210    | 220    | 182    | 182    | 244    | 244    | 166    | 188    | 161    | 167    |
| L16 | 187    | 190    | 229    | 235    | 177    | 187    | 210    | 232    | 170    | 186    | 257    | 281    | 166    | 166    | 165    | 167    |
| L17 | 187    | 190    | 229    | 235    | 175    | 185    | 210    | 232    | 170    | 186    | 255    | 301    | 166    | 166    | 165    | 167    |
| L18 | 166    | 187    | 229    | 229    | 175    | 185    | 210    | 210    | 182    | 182    | 257    | 293    | 164    | 164    | 167    | 167    |
| L19 | 171    | 187    | 211    | 233    | 187    | 195    | 210    | 220    | 182    | 188    | 244    | 287    | 160    | 160    | 161    | 167    |
| L20 | 185    | 187    | 213    | 229    | 175    | 189    | 210    | 220    | 188    | 191    | 255    | 285    | 160    | 188    | 165    | 167    |
| L21 | 181    | 187    | 211    | 231    | 177    | 179    | 210    | 228    | 188    | 191    | 244    | 267    | 164    | 164    | 161    | 167    |
| L22 | 166    | 187    | 213    | 213    | 177    | 177    | 206    | 235    | 186    | 188    | 244    | 279    | 164    | 164    | 167    | 167    |
| L23 | 166    | 187    | 213    | 229    | 181    | 185    | 210    | 230    | 182    | 188    | 247    | 299    | 162    | 168    | 167    | 167    |
| L24 | 166    | 187    | 213    | 229    | 181    | 185    | 210    | 230    | 182    | 188    | 247    | 299    | 162    | 168    | 165    | 167    |
| L25 | 187    | 187    | 237    | 237    | 177    | 179    | 210    | 228    | 186    | 191    | 273    | 283    | 164    | 164    | 165    | 167    |
| L26 | 187    | 190    | 233    | 233    | 179    | 185    | 210    | 210    | 191    | 191    | 244    | 244    | 160    | 164    | 165    | 165    |

|     |     |     |     |     |     |     |     |     |     |     |     |     |     |     |     |     |
|-----|-----|-----|-----|-----|-----|-----|-----|-----|-----|-----|-----|-----|-----|-----|-----|-----|
| L27 | 187 | 190 | 233 | 233 | 179 | 185 | 210 | 210 | 191 | 191 | 244 | 309 | 160 | 164 | 165 | 167 |
| L28 | 166 | 187 | 229 | 229 | 175 | 185 | 210 | 220 | 170 | 188 | 244 | 265 | 160 | 164 | 161 | 165 |
| L29 | 181 | 187 | 233 | 237 | 175 | 185 | 210 | 228 | 172 | 186 | 287 | 319 | 160 | 160 | 161 | 165 |
| L30 | 187 | 187 | 229 | 233 | 187 | 191 | 210 | 238 | 188 | 188 | 244 | 303 | 160 | 166 | 167 | 175 |
| L31 | 160 | 166 | 229 | 233 | 179 | 187 | 210 | 210 | 176 | 186 | 244 | 244 | 160 | 166 | 165 | 167 |
| L32 | 160 | 187 | 227 | 229 | 175 | 185 | 210 | 210 | 182 | 188 | 244 | 257 | 160 | 164 | 165 | 167 |
| L33 | 185 | 190 | 229 | 229 | 175 | 177 | 210 | 220 | 184 | 186 | 244 | 279 | 166 | 166 | 167 | 167 |
| L34 | 187 | 187 | 229 | 233 | 177 | 187 | 210 | 228 | 170 | 170 | 244 | 279 | 160 | 164 | 165 | 167 |
| L35 | 166 | 187 | 233 | 233 | 185 | 185 | 206 | 210 | 170 | 191 | 255 | 297 | 166 | 166 | 165 | 165 |
| L36 | 187 | 187 | 227 | 229 | 183 | 187 | 220 | 220 | 182 | 182 | 289 | 289 | 164 | 164 | 165 | 167 |
| L37 | 187 | 187 | 229 | 233 | 187 | 195 | 210 | 220 | 170 | 174 | 283 | 303 | 160 | 164 | 165 | 167 |
| L38 | 187 | 190 | 229 | 239 | 187 | 187 | 210 | 210 | 170 | 174 | 247 | 323 | 160 | 160 | 165 | 167 |
| L39 | 187 | 187 | 233 | 239 | 185 | 187 | 210 | 222 | 188 | 188 | 244 | 317 | 164 | 164 | 165 | 167 |
| L40 | 166 | 178 | 233 | 233 | 179 | 185 | 206 | 206 | 170 | 186 | 244 | 255 | 160 | 160 | 167 | 167 |
| L41 | 187 | 187 | 213 | 229 | 177 | 187 | 210 | 222 | 170 | 170 | 293 | 303 | 162 | 166 | 165 | 167 |
| L42 | 187 | 190 | 233 | 235 | 175 | 185 | 210 | 220 | 182 | 188 | 244 | 244 | 166 | 166 | 167 | 167 |
| L43 | 187 | 187 | 211 | 229 | 185 | 185 | 206 | 210 | 188 | 191 | 311 | 315 | 160 | 164 | 167 | 167 |
| L44 | 187 | 187 | 233 | 233 | 175 | 181 | 230 | 235 | 182 | 188 | 255 | 285 | 160 | 188 | 167 | 167 |
| L45 | 181 | 190 | 229 | 233 | 187 | 189 | 222 | 228 | 174 | 182 | 244 | 293 | 160 | 164 | 165 | 167 |
| L46 | 166 | 187 | 229 | 229 | 179 | 185 | 210 | 210 | 170 | 170 | 244 | 303 | 160 | 160 | 165 | 167 |
| L47 | 166 | 187 | 229 | 229 | 175 | 185 | 210 | 210 | 188 | 193 | 287 | 287 | 160 | 164 | 167 | 167 |
| L48 | 187 | 187 | 211 | 229 | 179 | 185 | 210 | 222 | 186 | 186 | 287 | 287 | 160 | 164 | 165 | 167 |
| L49 | 178 | 187 | 227 | 233 | 175 | 185 | 210 | 210 | 170 | 188 | 239 | 247 | 160 | 166 | 167 | 167 |
| L50 | 187 | 187 | 211 | 233 | 181 | 181 | 204 | 210 | 188 | 188 | 244 | 244 | 160 | 164 | 165 | 167 |
| L51 | 181 | 187 | 211 | 233 | 185 | 187 | 220 | 228 | 188 | 188 | 283 | 307 | 164 | 164 | 165 | 167 |
| L52 | 187 | 190 | 211 | 231 | 175 | 177 | 210 | 210 | 170 | 174 | 247 | 283 | 166 | 166 | 167 | 167 |
| L53 | 183 | 187 | 227 | 233 | 187 | 195 | 210 | 210 | 182 | 182 | 255 | 255 | 160 | 160 | 165 | 167 |
| L54 | 187 | 187 | 229 | 229 | 185 | 185 | 210 | 238 | 176 | 191 | 244 | 303 | 160 | 166 | 167 | 167 |
| L55 | 185 | 187 | 227 | 233 | 185 | 185 | 210 | 224 | 186 | 191 | 305 | 313 | 160 | 166 | 167 | 167 |

|     |     |     |     |     |     |     |     |     |     |     |     |     |     |     |     |     |
|-----|-----|-----|-----|-----|-----|-----|-----|-----|-----|-----|-----|-----|-----|-----|-----|-----|
| L56 | 185 | 187 | 227 | 233 | 185 | 185 | 210 | 224 | 186 | 191 | 305 | 313 | 160 | 164 | 169 | 169 |
| L57 | 183 | 190 | 229 | 229 | 177 | 179 | 222 | 228 | 182 | 182 | 244 | 283 | 164 | 164 | 165 | 167 |
| L58 | 187 | 187 | 229 | 229 | 177 | 179 | 222 | 228 | 182 | 188 | 244 | 283 | 164 | 164 | 165 | 167 |
| L59 | 166 | 187 | 211 | 235 | 175 | 185 | 210 | 210 | 188 | 205 | 247 | 267 | 160 | 166 | 167 | 167 |
| L60 | 199 | 199 | 227 | 229 | 177 | 185 | 230 | 235 | 188 | 188 | 244 | 287 | 162 | 166 | 167 | 167 |

---
